# Supplementary material
Source: PubMed Central journal article supplement (PMC5835746)
Supplement: AEM.02712-17_zam006188383s1.pdf [file AEM.02712-17_zam006188383s1.pdf]

## Supplemental information

S 1

**S 1: Complete screening data for 755 transformants from three plasmid/linearization combinations and transformation performed in triplicate.** Cells were pre-grown on glucose for 60 h and subsequently induced with methanol for 48 h. On the x-axis the well numbers of each clone is provided. *GUT1* targeting *SwaI* linearized vectors were replica-plated in glycerol containing media after growth on glucose for 60 h to test for specific/non-specific integration. Wells H1-3 of each plate were loaded with the wildtype strain as a negative control and wells H4-12 left empty as sterile controls.

One transformant of GUT1-*SacI* replicate 2 did not grow on glucose and was hence omitted from the analysis. As the transformant grew as a colony on agar plates after transformation this result is hard to rationalize but may be explained by a rare integration event (Schwarzthans J-P, Wibberg D, Winkler A, Luttermann T, Kalinowski J, Friehs K. Sci Rep 6:38952, 2016).



# GUT1 integration vector linearized with *SacI*

## Replicate 1

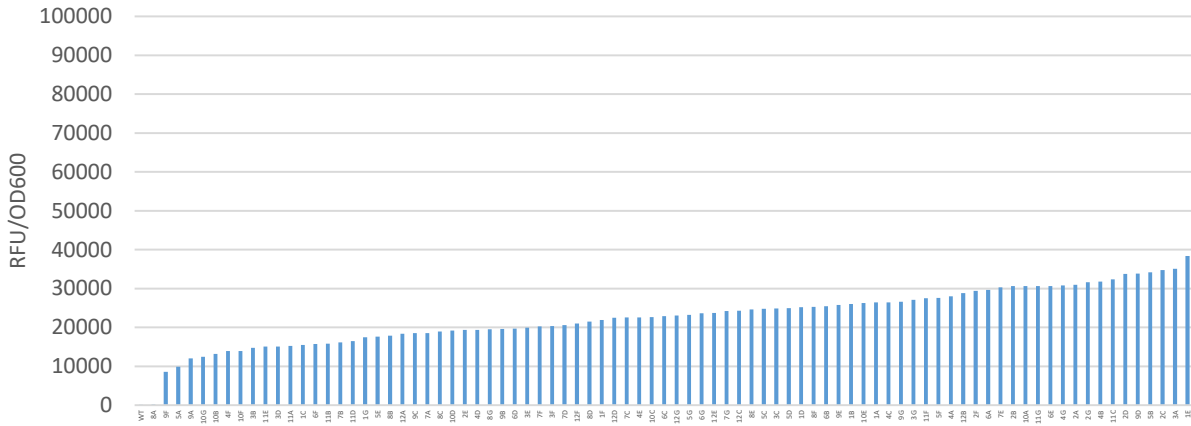

## Replicate 2

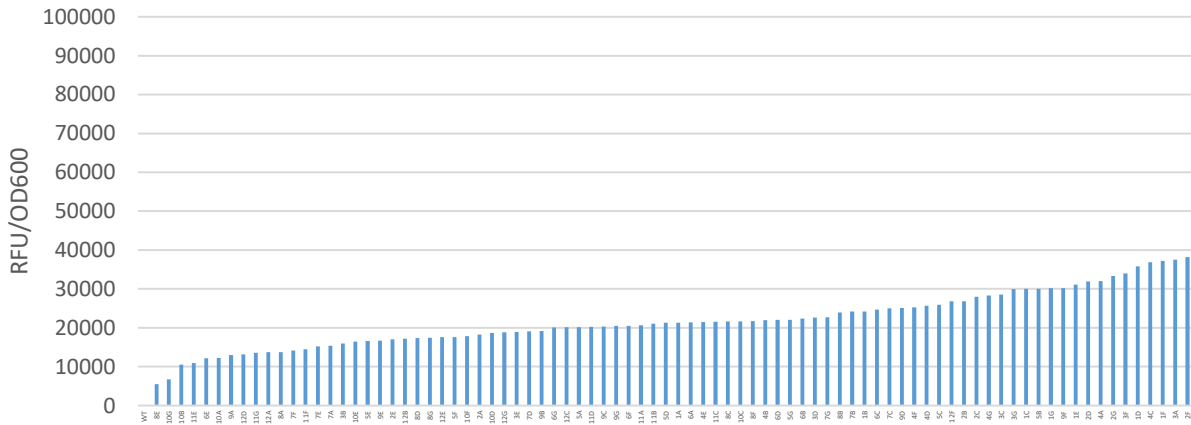

## Replicate 3

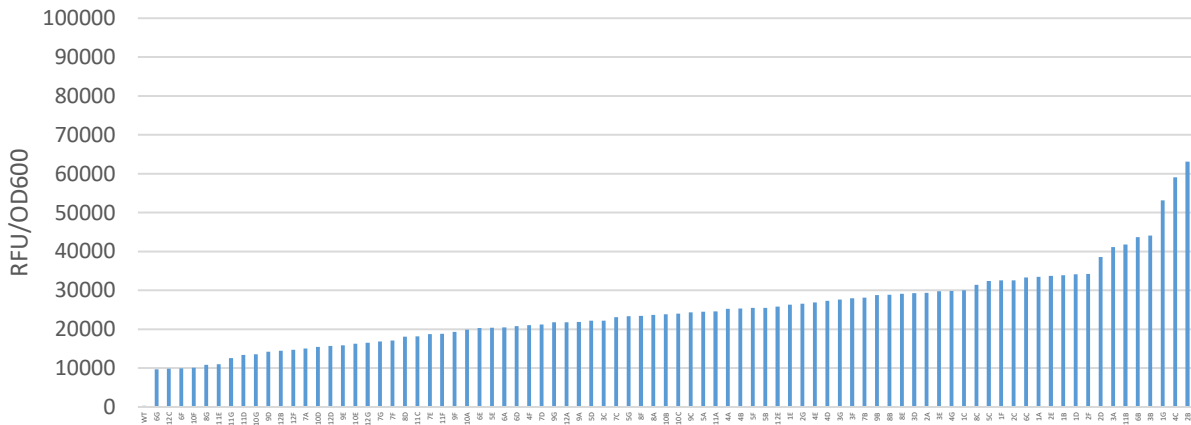

# STD vector without integration sequences linearized with *SacI*

## Replicate 1

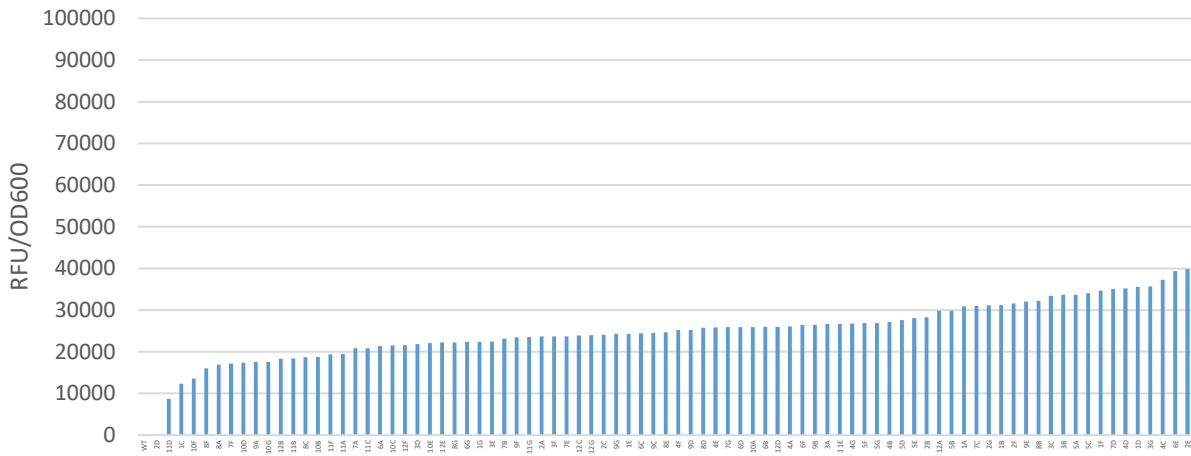

## Replicate 2

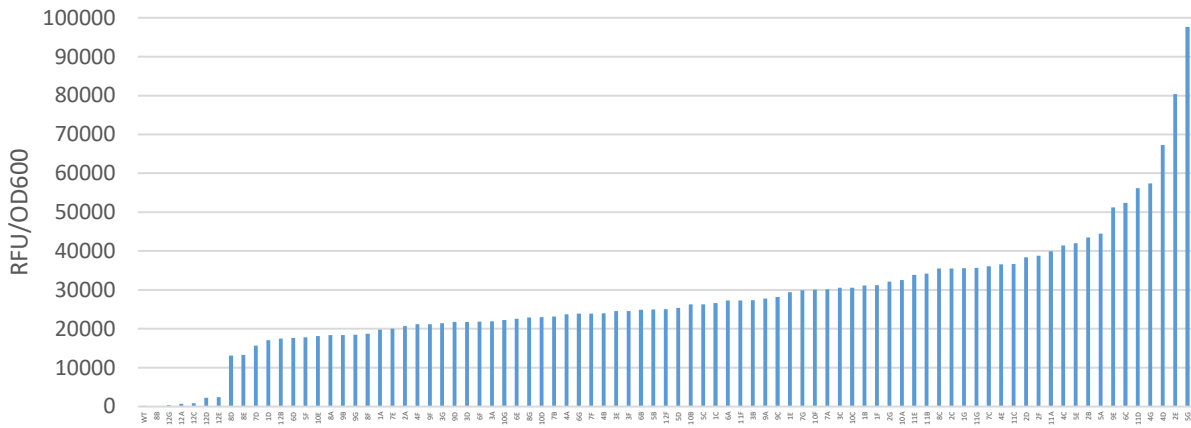

## Replicate 3

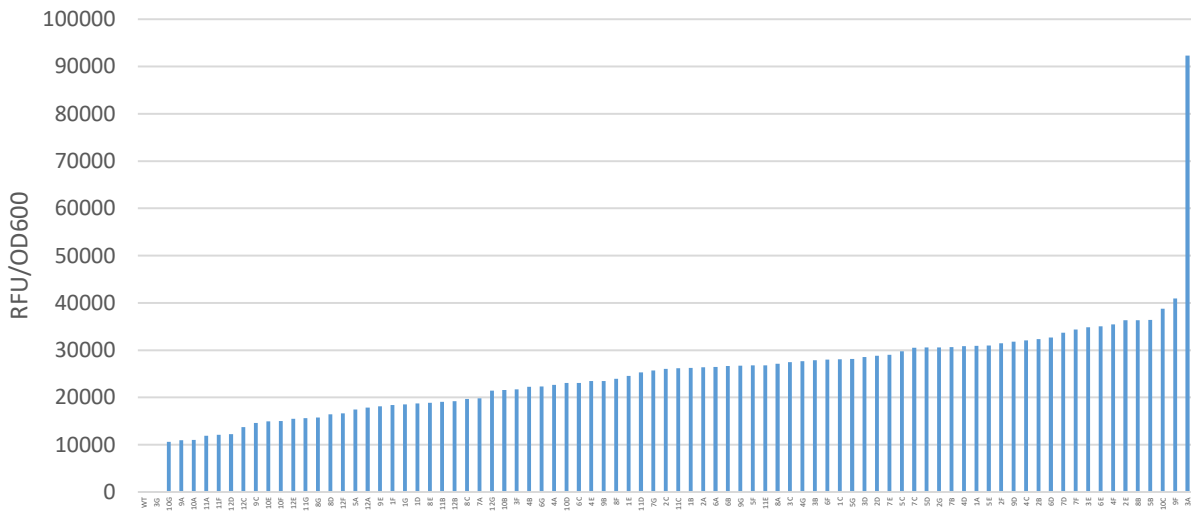

S 2

**S 2: Integration rates of specific and non-specific GUT1-Swal transformants from different replicates.**

*GUT1* targeting *Swal* linearized vectors were replica-plated in glycerol containing media after growth on glucose for 60 h to test for specific/non-specific integration.

| Transformation replicate (number) | Integration event (number of colonies) |                                         | Total (colonies) | % specific integration |
|-----------------------------------|----------------------------------------|-----------------------------------------|------------------|------------------------|
|                                   | Specific (no growth on glycerol)       | Non-specific (still growth on glycerol) |                  |                        |
| 1                                 | 58                                     | 26                                      | 84               | 69.0                   |
| 2                                 | 49                                     | 35                                      | 84               | 58.3                   |
| 3                                 | 51                                     | 33                                      | 84               | 60.7                   |
| Sum                               | 158                                    | 94                                      | 252              | <b>62.7</b>            |

S 3

**S 3: Rescreening results of 44 selected transformants.**

The summary table shows a comparison of screening, rescreening results and which transformants were used for whole genome sequencing. Reporter fluorescence measurements are shown in separate diagrams for each plasmid/linearization.

The strains were streaked as single colonies from glycerol stocks. Cells were pre-grown on glucose for 60 h and subsequently induced with methanol for 48 h. Mean values of biological four-fold replicates are shown. For *GUT1-Swal* constructs transformants were replica-plated in glycerol containing media after growth on glucose for 60 h to confirm specific/non-specific integration.

Extended discussion

In general, the initial screening results were reproduced in the rescreening: Outliers that had shown low or no fluorescence (e.g. *GUT1 Swal* clones R1-4E [*i.e.* replicate 1, well 4E]/QTV84 and R3-10C/QTV85) yielded similar results. Transformants showing increased expression also yielded reproducible results (e.g. *GUT1 SacI* clones R1-1E/QTV92 and R3-4C/QTV93 or *STD SacI* R2-2E/QTV95, R2-5G/QTV96 and R3-3A/QTV97). Transformants, that in the initial screening had shown only moderately reduced or increased expression, showed mostly average expression in the rescreening (*i.e.* similar reporter protein fluorescence as specifically integrated cassettes). This result was expected since we had initially sampled a large number of transformants. Even for a single strain, according to a normal distribution, a certain number of higher/lower expressing sample points would be expected. When these strains were now measured in biological replicates, this distribution issue was accounted for. Notably, for specifically integrated clones (of the *GUT1 Swal* plasmid), we did not find any clones with clearly elevated or reduced expression, which is consistent with the boxplot analysis where only one outlier was apparent (Fig. 2D).

Summary table of rescreening clones

| Vector & linearization | Transformant |            |              | Expression            |                    |                           | Selected for genome sequencing | Identifier assigned |
|------------------------|--------------|------------|--------------|-----------------------|--------------------|---------------------------|--------------------------------|---------------------|
|                        | Replicate    | Identifier | Integration  | Screening expression  | Rescreening        | Screening vs. rescreening |                                |                     |
| GUT1 Swal              | 1            | 6E         | specific     | average               | average            | confirmed                 | Yes                            | QTV76               |
|                        |              | 4E         | non-specific | no expression         | no expression      | confirmed                 | Yes                            | QTV84               |
|                        |              | 7B         | non-specific | low                   | average            | dissimilar                | No                             | n.a.                |
|                        |              | 5F         | non-specific | average (rather low)  | average            | similar                   | No                             | n.a.                |
|                        |              | 11C        | non-specific | average (rather high) | average            | similar                   | Yes                            | QTV79               |
|                        |              | 11D        | non-specific | ~high                 | ~high              | confirmed                 | Yes                            | QTV82               |
|                        | 2            | 6F         | specific     | ~low                  | average            | dissimilar                | No                             | n.a.                |
|                        |              | 9G         | specific     | average               | average            | confirmed                 | Yes                            | QTV77               |
|                        |              | 1E         | specific     | ~high                 | ~average           | dissimilar (large SD)     | No                             | n.a.                |
|                        |              | 6C         | non-specific | low                   | average            | dissimilar                | Yes                            | QTV80               |
|                        |              | 4F         | non-specific | average               | average            | confirmed                 | No                             | n.a.                |
|                        |              | 4C         | non-specific | ~high                 | ~high (large SD)   | similar (large SD)        | No                             | n.a.                |
|                        |              | 10B        | non-specific | ~high                 | ~high              | confirmed                 | Yes                            | QTV83               |
|                        | 3            | 12A        | specific     | low-average           | average            | dissimilar                | No                             | n.a.                |
|                        |              | 7B         | specific     | average               | average            | confirmed                 | Yes                            | QTV78               |
|                        |              | 10C        | non-specific | low                   | low                | confirmed                 | Yes                            | QTV85               |
|                        |              | 3C         | specific     | average-high          | average            | dissimilar                | No                             | n.a.                |
|                        |              | 2D         | specific     | low-average           | average            | dissimilar                | No                             | n.a.                |
|                        |              | 6D         | non-specific | average               | average            | confirmed                 | Yes                            | QTV81               |
|                        |              | 4D         | non-specific | ~high                 | ~average           | dissimilar                | No                             | n.a.                |
|                        |              | 5E         | non-specific | ~high                 | ~average-high (SD) | ~dissimilar               | No                             | n.a.                |
| GUT1 Sacl              | 1            | 9F         | -            | low-average           | low-average        | confirmed                 | Yes                            | QTV86               |
|                        |              | 7G         | -            | average               | average            | confirmed                 | Yes                            | QTV89               |
|                        |              | 1E         | -            | average-high          | average-high       | confirmed                 | Yes                            | QTV92               |
|                        | 2            | 8E         | -            | low                   | low-average        | ~similar                  | Yes                            | QTV87               |
|                        |              | 10G        | -            | low                   | low-average        | ~similar                  | No                             | n.a.                |
|                        |              | 11C        | -            | average               | average            | confirmed                 | No                             | n.a.                |
|                        |              | 2F         | -            | average-high          | average            | dissimilar                | Yes                            | QTV90               |

|          |   |     |   |              |                  |                  |     |        |
|----------|---|-----|---|--------------|------------------|------------------|-----|--------|
|          | 3 | 6G  | - | low-average  | low-average      | confirmed        | Yes | QTV88  |
|          |   | 4B  | - | average      | average          | confirmed        | Yes | QTV91  |
|          |   | 4C  | - | high         | high             | confirmed        | Yes | QTV93  |
|          |   | 2B  | - | high         | high             | confirmed        | Yes | QTV94  |
| STD Sacl | 1 | 11D | - | low-average  | average          | dissimilar       | No  | n.a.   |
|          |   | 4F  | - | average      | average          | confirmed        | Yes | QTV98  |
|          |   | 2E  | - | average-high | average          | dissimilar       | No  | n.a.   |
|          | 2 | 12C | - | low          | average          | dissimilar       | No  | n.a.   |
|          |   | 12E | - | low          | average          | dissimilar       | Yes | QTV99  |
|          |   | 8D  | - | low-average  | average          | no, average      | No  | n.a.   |
|          |   | 6A  | - | average      | low-average (SD) | ~dissimilar (SD) | No  | n.a.   |
|          |   | 2E  | - | high         | high             | confirmed        | Yes | QTV95  |
|          | 3 | 5G  | - | high         | high             | confirmed        | Yes | QTV96  |
|          |   | 10G | - | low-average  | low-average      | confirmed        | No  | n.a.   |
|          |   | 6B  | - | average      | average          | confirmed        | Yes | QTV100 |
|          |   | 3A  | - | high         | high             | confirmed        | Yes | QTV97  |

Reporter fluorescence measurements

*GUT1* integration vector linearized with *SwaI*

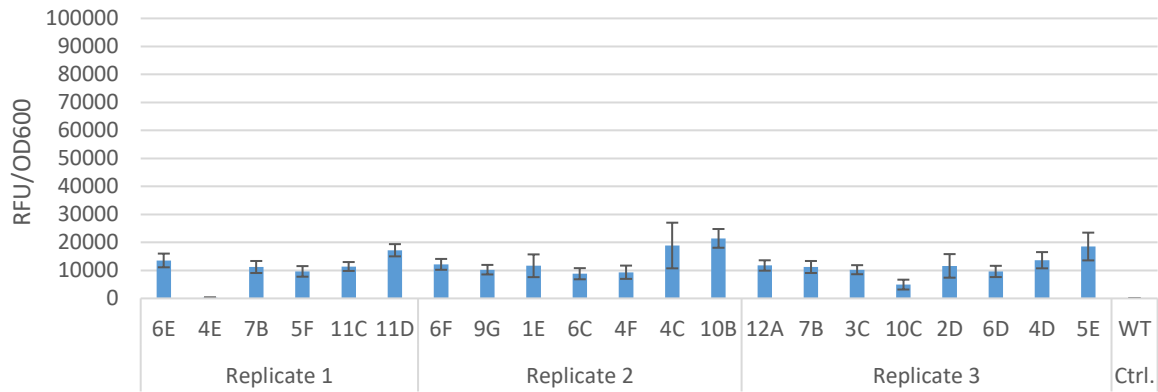

*GUT1* integration vector linearized with *SacI*

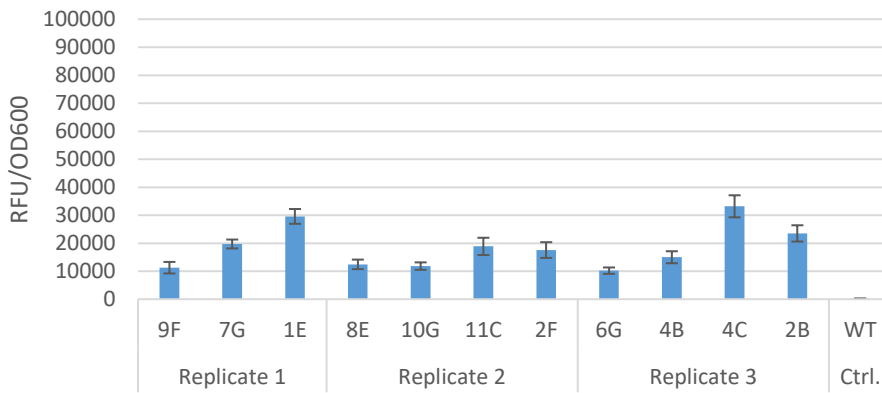

*STD* vector without integration sequences linearized with *SacI*

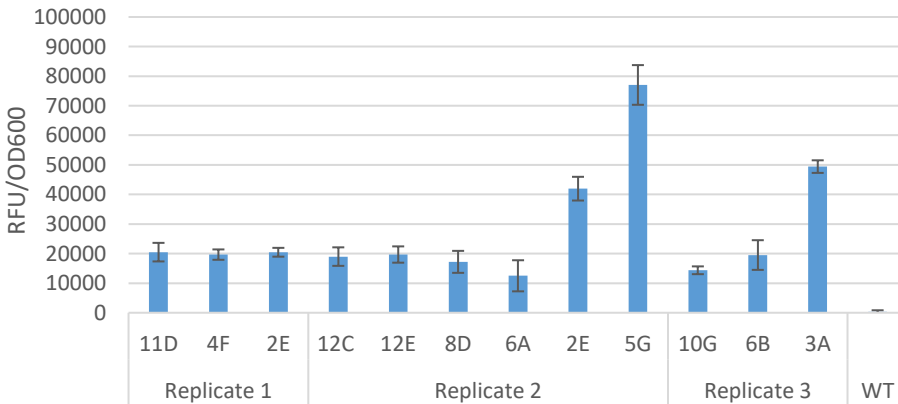



**S 4:** Summary of statistics from Illumina MiSeq sequencing of 25 transformants (QTV76-100) and two controls (QTV19 and mut<sup>s</sup>) and mapping to CBS7435, the mitochondrial genome and respective plasmid. Statistics were taken from BAM QC analysis files generated with Qualimap 2.2.

| Line             | Number of reads | Mapped paired reads (%) | Mean coverage (x times) | Mitochondrial genome coverage (x times) | Mean mapping quality | General error rate (%) | GC content (%) |
|------------------|-----------------|-------------------------|-------------------------|-----------------------------------------|----------------------|------------------------|----------------|
| QTV19            | 4,372,628       | 91.36                   | 62.56                   | 779.20                                  | 39.2                 | 0.94                   | 40.48          |
| mut <sup>s</sup> | 8,128,680       | 97                      | 123.88                  | 635.02                                  | 40.51                | 0.59                   | 41.33          |
| QTV76            | 3,555,518       | 90                      | 50.30                   | 503.25                                  | 39                   | 1.08                   | 40.65          |
| QTV77            | 3,092,864       | 90.21                   | 43.92                   | 457.58                                  | 38.99                | 1.10                   | 40.62          |
| QTV78            | 3,584,154       | 90.69                   | 51.18                   | 560.01                                  | 39.12                | 1.04                   | 40.62          |
| QTV79            | 3,146,518       | 88.82                   | 43.89                   | 433.56                                  | 38.76                | 1.15                   | 40.70          |
| QTV80            | 4,665,052       | 90.16                   | 66.15                   | 613.13                                  | 38.94                | 1.08                   | 40.86          |
| QTV81            | 4,825,938       | 91.64                   | 69.34                   | 494.37                                  | 39.32                | 0.95                   | 41.16          |
| QTV82            | 4,840,258       | 92.44                   | 70.34                   | 573.92                                  | 39.47                | 0.90                   | 41.04          |
| QTV83            | 3,359,162       | 91.2                    | 47.98                   | 427.96                                  | 39.24                | 0.91                   | 40.77          |
| QTV84            | 10,477,258      | 97.79                   | 161.02                  | 488.41                                  | 40.55                | 0.54                   | 41.34          |
| QTV85            | 3,227,268       | 90.86                   | 46.13                   | 281.66                                  | 39.21                | 0.97                   | 40.90          |
| QTV86            | 3,998,764       | 93.29                   | 58.66                   | 444.50                                  | 39.69                | 0.80                   | 40.76          |
| QTV87            | 4,974,690       | 89.64                   | 69.86                   | 600.19                                  | 38.9                 | 1.05                   | 40.59          |
| QTV88            | 5,872,234       | 91.43                   | 84.65                   | 641.39                                  | 39.32                | 0.98                   | 40.67          |
| QTV89            | 5,452,592       | 91                      | 78.23                   | 601.78                                  | 39.21                | 1.03                   | 40.82          |
| QTV90            | 6,080,906       | 91.71                   | 87.97                   | 632.90                                  | 39.35                | 0.98                   | 40.88          |
| QTV91            | 5,793,460       | 88.91                   | 80.72                   | 757.23                                  | 38.67                | 1.13                   | 40.76          |
| QTV92            | 13,395,412      | 95.94                   | 201.04                  | 657.43                                  | 40.35                | 0.60                   | 41.38          |
| QTV93            | 4,291,388       | 92.87                   | 62.54                   | 485.41                                  | 39.52                | 0.84                   | 40.67          |
| QTV94            | 5,509,700       | 92.49                   | 79.18                   | 640.72                                  | 39.48                | 0.80                   | 40.70          |
| QTV95            | 5,669,660       | 92.23                   | 81.98                   | 650.28                                  | 39.49                | 0.87                   | 40.72          |
| QTV96            | 6,924,978       | 89.45                   | 96.88                   | 779.59                                  | 38.87                | 1.06                   | 40.64          |
| QTV97            | 9,552,652       | 94.95                   | 142.88                  | 346.94                                  | 40.13                | 0.77                   | 41.58          |
| QTV98            | 6,227,676       | 96.05                   | 93.44                   | 625.46                                  | 40.25                | 0.64                   | 40.77          |
| QTV99            | 5,032,884       | 92.37                   | 72.51                   | 405.23                                  | 39.49                | 0.89                   | 40.84          |
| QTV100           | 16,303,798      | 98.14                   | 249.54                  | 165.29                                  | 40.85                | 0.51                   | 41.51          |

**S 5:** Example of sequence mapping to identify the insertions sites listed in Tab. 1 in the main manuscript.

- (A) Example 1: IGV window of *mut<sup>S</sup>* (wild type), QTV76, QTV77 and QTV78 reads mapped against the reference. In this zoom in on chromosome 4, the deletion of the *GUT1* gene (1866 bp from 301,326 to 303,192) can be clearly seen by the absence of mapped reads in the transformants.
- (B) Example 2: The BLAST readwalking method pinpointed the putative insertion site on chromosome 2 in QTV80. In this zoom in on IGV, the BLAST reads are seen in the bottom panel, above the genome annotation. The mapping is disrupted in QTV80 (top panel) and the reads that did map contain parts of the plasmid and genome. It is compared to the perfect mapping of the wildtype (*mut<sup>S</sup>*) in the second panel.
- (C) Example 3: The BLAST readwalking approach pinpointed a deletion on chromosome 1 in QTV85 which is a potential plasmid insertion site. In the zoom in on IGV, the BLAST reads are in the bottom panel, just above the annotated genes. The deletion can be clearly seen in QTV85 (top) panel compared to the wildtype (*mut<sup>S</sup>*) mapping.
- (D) Example 4: The BLAST readwalking approach (BLASTed reads in bottom panel) pinpointed an area of disrupted mapping in the *AOX1* promoter on chromosome 4 in QTV86 (top panel) compared to the wildtype (*mut<sup>S</sup>*, second panel) and other lines (here QTV88, third panel).

A

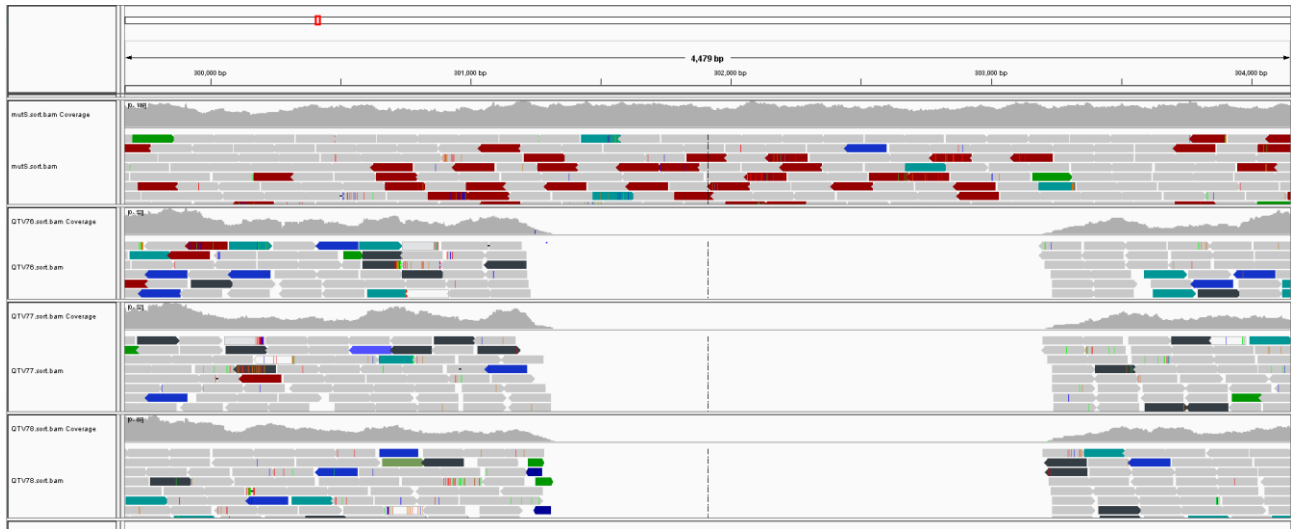

B

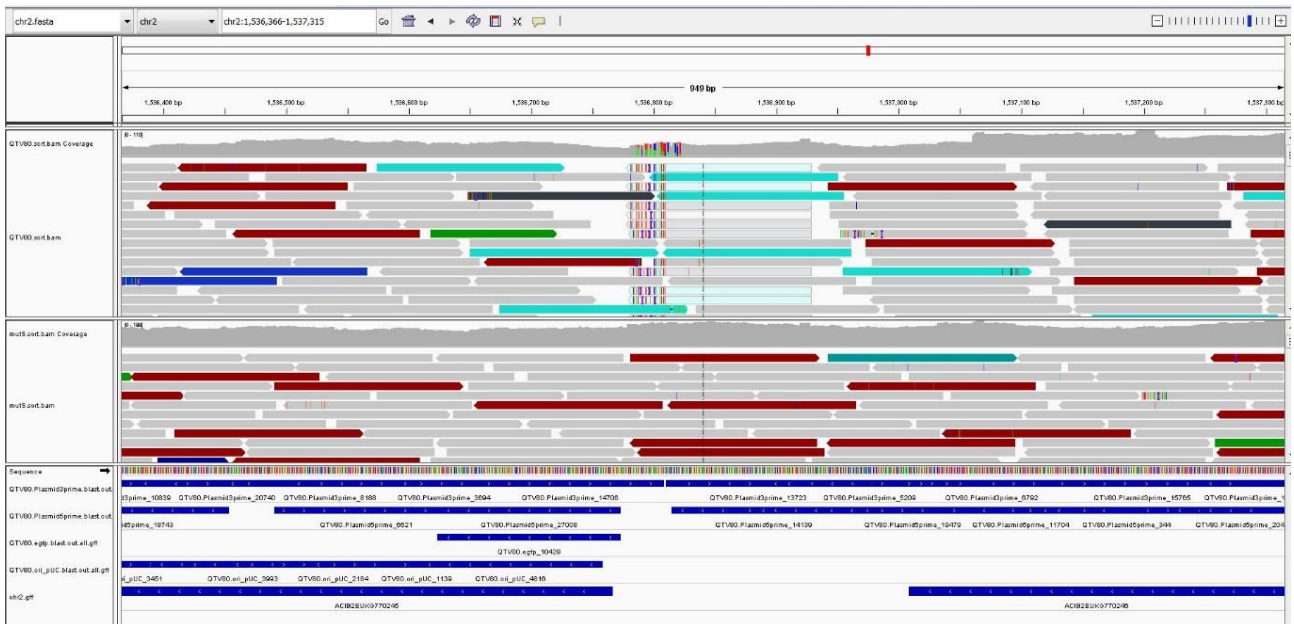

C

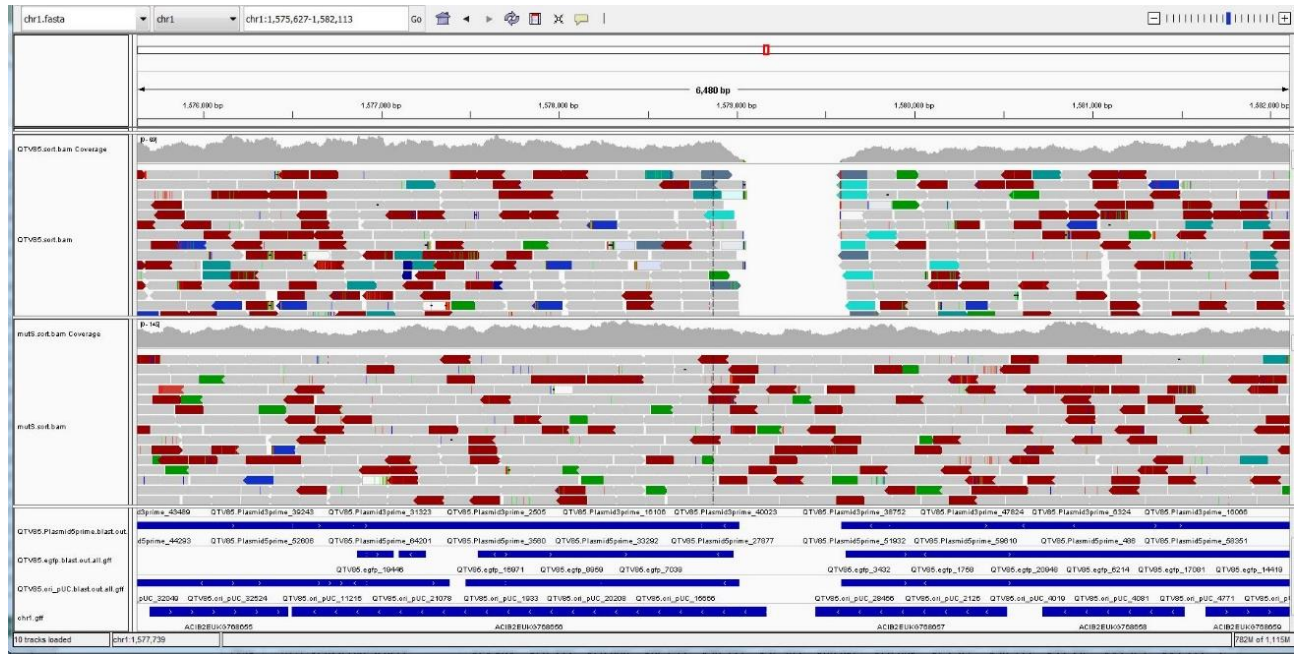

D

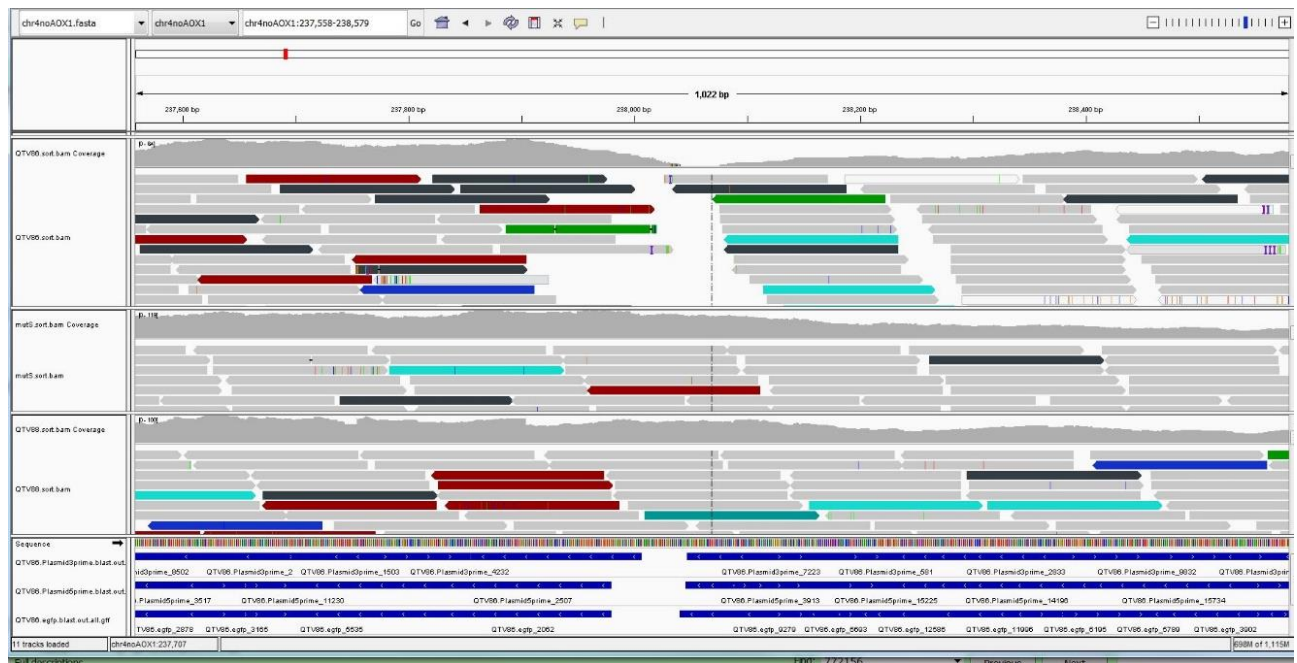

**S 6:** List of genes deleted in the approximate 69 kbp fragment lost on chromosome 4 in QTV84.

| <b>Gene</b>     | <b>Homology identified in annotation or domain found with BLAST</b>               |
|-----------------|-----------------------------------------------------------------------------------|
| ACIB2EUKG773048 | GAL4 transcription factor                                                         |
| ACIB2EUKG773049 | Glycoside hydrolase family 3 protein                                              |
| ACIB2EUKG773050 | Glycoside hydrolase family 78 protein                                             |
| ACIB2EUKG773051 | Maltose permease, high-affinity maltose transporter (alpha-glucoside transporter) |
| ACIB2EUKG773052 | Hypothetical protein                                                              |
| ACIB2EUKG773053 | Hypothetical protein                                                              |
| ACIB2EUKG773054 | Low-affinity Fe(II) transporter of the plasma membrane                            |
| ACIB2EUKG773055 | Sugar phosphate permease [Carbohydrate transport and metabolism]                  |
| ACIB2EUKG773056 | High affinity nicotinic acid plasma membrane permease                             |
| ACIB2EUKG773057 | Proton-coupled oligopeptide transporter of the plasma membrane                    |
| ACIB2EUKG773058 | Hypothetical protein                                                              |
| ACIB2EUKG773059 | Putative flocculin                                                                |
| ACIB2EUKG773060 | Hypothetical protein                                                              |
| ACIB2EUKG773061 | Methionine sulfoxide reductase                                                    |
| ACIB2EUKG773062 | NADPH-dependent medium chain alcohol dehydrogenase                                |
| ACIB2EUKG773063 | Hypothetical protein                                                              |
| ACIB2EUKG773064 | Hypothetical protein                                                              |

**S 7: Copy number estimates for each transformant.** Copy number was calculated in two different ways: 1) as relative coverage from SAMtools (BAM stats) calculated statistics; 2) by averaging the 'transcript per million (TPM) values for eGFP, Zeocin Resistance and PUC-origin sequences. In table A, summary values from supplementary file S 7 are shown and in panel B the BAM stats and TPM obtained CNs are correlated, demonstrating excellent agreement ( $R^2=0.99$ ). Raw data and calculations are shown in the supplementary Excel file S 7.

TPM represents Salmon's estimate of the relative abundance of this transcript (in units of transcripts per million) and is the recommended relative abundance measure to use for downstream analysis. TPM gives the number of transcripts of a given gene if there were one million genes. It therefore accounts for gene length and library size.

Given that we are looking at genomic reads rather than RNAseq data, we would theoretically expect each of the 5332 *P. pastoris* genes in the transcript file to have the same TPM of just under 200 (there are 5332 genes in the output and  $1,000,000/5332$  is 187.5). Thus assuming even coverage, one copy will be represented by a TPM of 187.5.

#### A

| Line   | Copy number SAMtools (BAM stats) | Average copy number from TPM values | Rounded copy number |
|--------|----------------------------------|-------------------------------------|---------------------|
| QTV76  | 0.6058                           | 0.6768                              | 1                   |
| QTV77  | 0.6608                           | 0.5824                              | 1                   |
| QTV78  | 0.7201                           | 0.6951                              | 1                   |
| QTV79  | 0.7010                           | 0.5707                              | 1                   |
| QTV80  | 0.8522                           | 0.7346                              | 1                   |
| QTV81  | 0.9243                           | 0.8395                              | 1                   |
| QTV82  | 1.8054                           | 1.7745                              | 2                   |
| QTV83  | 1.4162                           | 1.3572                              | 1                   |
| QTV84  | 1.2110                           | 1.1716                              | 1                   |
| QTV85  | 0.7803                           | 0.6157                              | 1                   |
| QTV86  | 1.0203                           | 0.7384                              | 1                   |
| QTV87  | 0.8369                           | 0.7783                              | 1                   |
| QTV88  | 0.8240                           | 0.7028                              | 1                   |
| QTV89  | 0.8657                           | 0.7019                              | 1                   |
| QTV90  | 0.8637                           | 0.7428                              | 1                   |
| QTV91  | 0.8371                           | 0.7704                              | 1                   |
| QTV92  | 1.8785                           | 2.0084                              | 2                   |
| QTV93  | 2.0182                           | 2.1124                              | 2                   |
| QTV94  | 2.2047                           | 2.3392                              | 2                   |
| QTV95  | 2.3142                           | 2.3378                              | 2                   |
| QTV96  | 4.6788                           | 4.7903                              | 5                   |
| QTV97  | 4.9057                           | 4.9626                              | 5                   |
| QTV98  | 0.8635                           | 0.8346                              | 1                   |
| QTV99  | 0.8234                           | 0.7851                              | 1                   |
| QTV100 | 1.3011                           | 1.3548                              | 1                   |

**B**

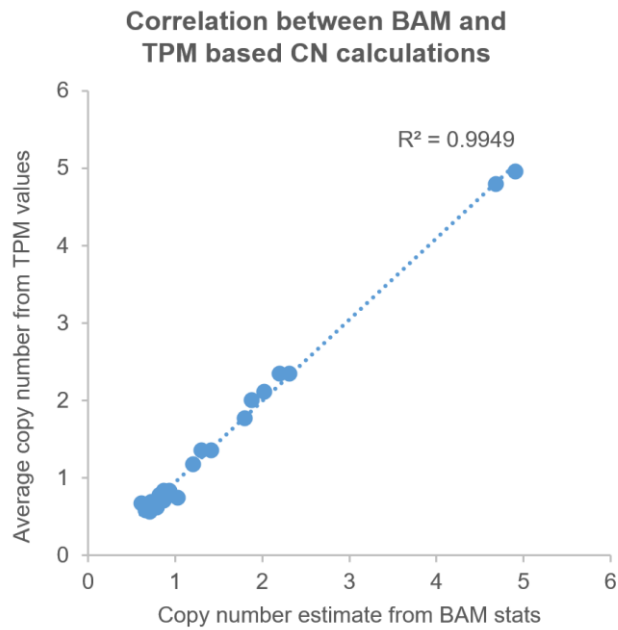

S 8

**S 8: Raw data on SNP identification after filtering provided as supplementary file (.xlsx table format, each sheet represents a different strain).** Each sheet shows the commands used in Bcftools 1.3.1 (Li H, Bioinformatics 27:2987–93, 2011) to filter the list of total variants identified, the exact SNPs and indels retained after filtering and their effects, when in exons (or very close to exons) as determined using snpEff 4.3p and a custom-built database.

S 9

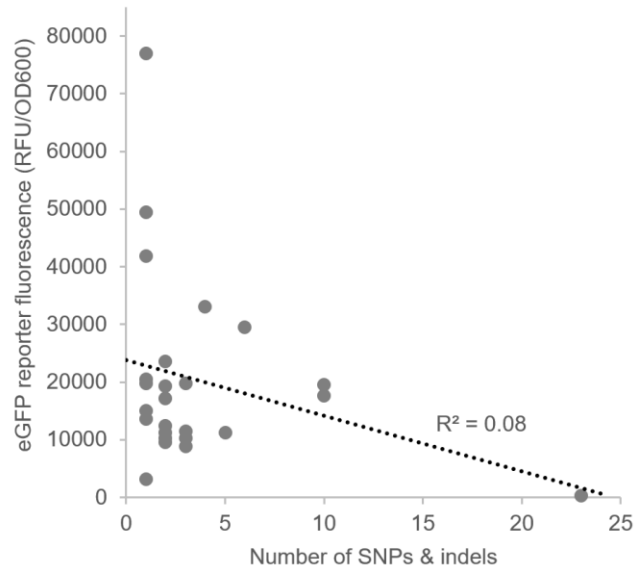

**S 9: The number of sequence variants does not correlate with reporter protein fluorescence.** Correlation between sequence variants (SNPs, indels in all four chromosomes and mitochondria, see [Tab. 1](#) for a summary and S 8 for raw data) and eGFP reporter protein fluorescence (normalized per OD600, as obtained from the rescreening and shown in Fig. 3).



**S 10: Extended discussion on effects of GUT1/STD vectors and linearization by *SwaI/SacI*.**

In Fig. 3B, QTV86-88 and QTV89-91 are categorized into average (low) and average (high) groups, respectively, showing different expression although their copy numbers are almost the same (S 7).

We noticed this phenomenon when performing the screening/rescreening (Fig. 2, S 1; Fig. 3, S 3). For construct GUT1, linearized with *SacI*, some of the clones from the middle of the landscape (what we referred to in all other cases as 'average') seemed to represent different populations in the rescreening. Hence we termed them 'average (low)' and 'average (high)', as these two groups had near identical copy number estimates and seemed to perform within each group uniformly (as opposed to high expressers QTV92,93,94 that showed with two copies each clearly elevated expression, S 7). We could only resolve the integration locus of one (QTV86) out of the six strains (QTV86 was found to be correctly integrated to the *AOX1* locus). The other five strains proved to be evasive for identifying the integration site.

This phenomenon is puzzling and we could not come up with a clear mechanistic explanation. We hypothesize that this issue may have to do with the presence of the *GUT1* integration sequences. If it had to do with the linearization (*SwaI/SacI*) and specifically some issue with the *SacI* targeted integration, one would expect to see the same phenomenon also with the STD plasmid, that was also linearized with *SacI* (and not only the GUT1 plasmid). But for the STD plasmid, we noticed only one population of average clones. It may be that this effect only occurs in the combination of *GUT1* integration sequence being present and *SacI* digestion. This might be related to the phenomenon of linearization of the same plasmid (GUT1) with two different restriction endonucleases yielding different expression medians in the screening (Fig. 2C), as discussed in the main manuscript in section 'Effect of plasmid design, vector linearization and type of integration event'.

Maybe a similar proposed effect of the *GUT1* sequence also influences the average low/high phenomenon. A previous report (Schwarzthans J-P, Wibberg D, Winkler A, Luttermann T, Kalinowski J, Friehs K. *Microb Cell Fact*;15:84, 2016) described recombination events where the *AOX1* terminator recombined with the 3' *AOX1* homologous region, leading to a loss of the gene of interest. It may be that in our setting the *GUT1/AOX1* sequences may recombine in a similar fashion, resulting in a maintenance/loss of the *GUT1* sequence possibly affecting *AOX1* expression. In detail, considering Figure 1A, lower illustration, imagining that only the pAOX1 3' region recombines – then the pAOX1 sequence would not be in proximity with the possibly repressing *GUT1* sequence. But if also the pAOX1 5' region recombines, the *GUT1* region would be adjacent to the pAOX1, as if linearizing with *SwaI*. This notion is supported by the GUT1-*SwaI* linearized average transformants [that always have the *GUT1* integration sequence 5' of the *AOX1* promoter] rather matching the GUT1-*SacI* average (low) clones [and QTV86, as an 'average (low)' strain being correctly integrated to the *AOX1* locus], whereas the STD-*SacI* linearized clones [where inherently no *GUT1* sequence is present on the vector] rather match the GUT1-*SacI* average (high) clones]. However, we cannot prove this theory, as the Illumina reads yielded inconclusive results or are too short to cover these extensive sequences/integration events. Future studies with technologies providing longer read lengths (SMRT/Pacbio) may help to resolve these issues.
